# Supplementary material
Source: Springer Nature journal article supplement (http://www.springermedizin.de/resource/supplementary/12986_2010_308_MOESM1_ESM.pdf/25655802)

(A) Total GLP-1

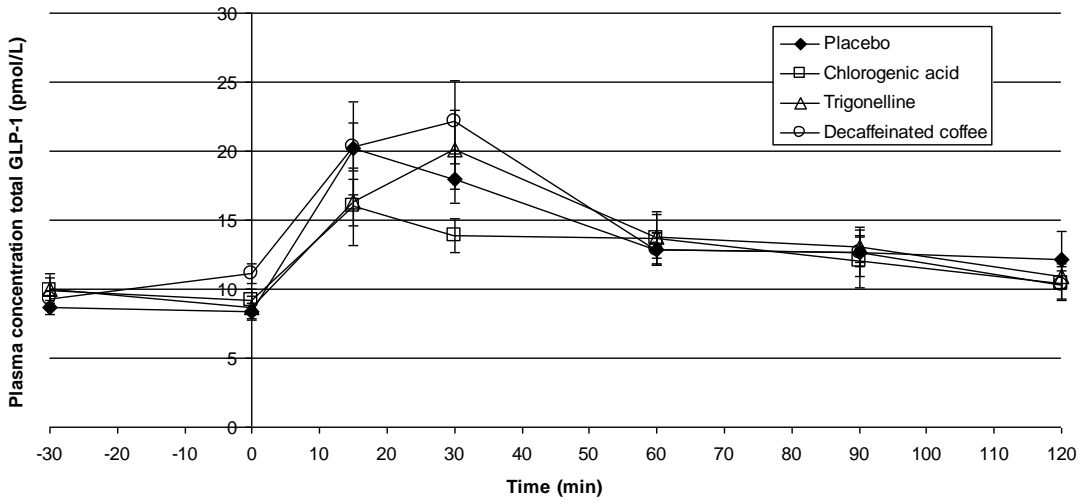

(B) Intact GLP-1

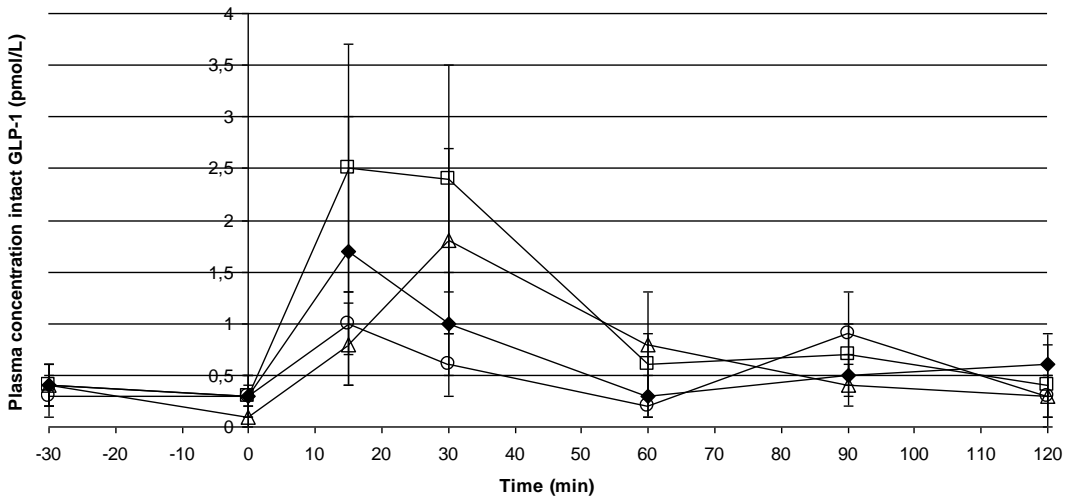

(C) GIP

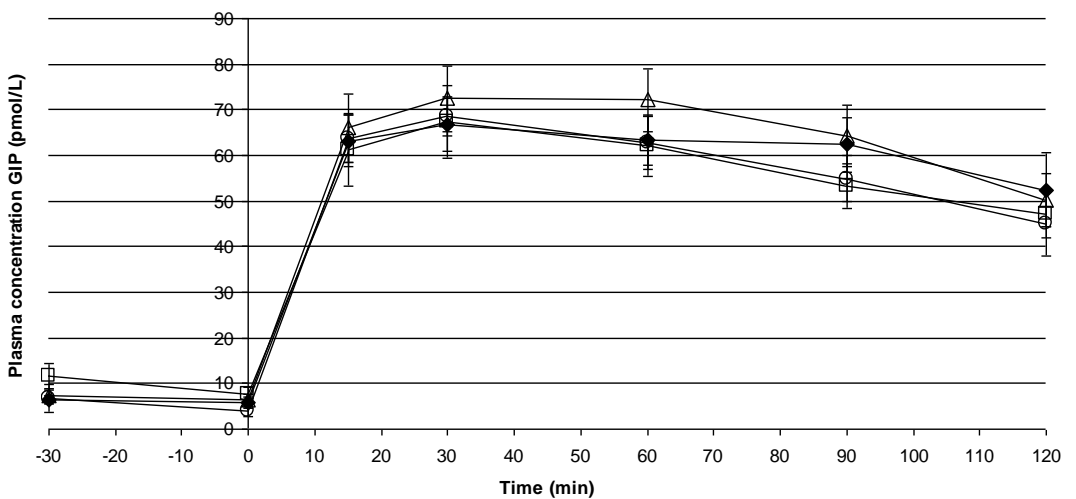

Supplement: MOESM1 [file 25655802]
